# Supplementary material for: Self-Reported Use of COVID-19 Immunologic Test Results to Inform Decisions About Daily Activities and COVID-19 Vaccination
Source: bioRxiv or medRxiv preprint supplement (doi:10.1101/2022.07.01.22277108), 2022-07-02
Supplement: Supplementary file [file media-1.pdf]

Demographic Information

Q1. What is your biological sex?

- Male
- Female
- Other

If Q1 = Other

Q2. Please describe your biological sex:

---

Q3. What is your race/ethnicity? Select all that apply:

- American Indian or Alaskan Native
- Asian
- Black or African American
- Hispanic or Latino/a
- Native Hawaiian or Other Pacific Islander
- White
- Other
- Unknown

If Q3 = Other

Q4. Please describe your race/ethnicity:

---

COVID-19 Vaccine Information

Q1. Have you received a vaccine against COVID-19?

- Yes
- No

If Q1 = No → T-Detect COVID-19 Test Information

If Q1 = Yes

Q2. How many times had you received a dose of a COVID-19 vaccine?

- 1
- 2
- 3

Q2 will determine how many q's below the participant receives.

Q3. When did you receive your first dose of the vaccine (Month/Day/Year)?

\_\_\_\_\_

(MM/DD/YYYY)

Q4. When did you receive your second dose of the vaccine (Month/Day/Year)?

\_\_\_\_\_

(MM/DD/YYYY)

Q5. When did you receive your third dose (or booster) of the vaccine (Month/Day/Year)?

\_\_\_\_\_

(MM/DD/YYYY)

Q6. Which vaccine did you receive? The company name that developed the vaccine will be listed on the vaccine card you were given after you received it.

- Pfizer-BioNTech
- Moderna
- Janssen (Johnson & Johnson)
- AstraZeneca
- Novavax
- Other
- Not sure

If Q6 = Other

Q7. Please list the other vaccine you received.

\_\_\_\_\_

T-Detect COVID-19 Test Information

Q1. When did you give your blood sample for the T-Detect COVID Test?

\_\_\_\_\_

(MM/DD/YYYY)

Q2. Were you experiencing symptoms of COVID-19 when you gave your blood sample for the T-Detect COVID Test?

- Yes
- No

**If Q2=Yes**

Q3. In the few days before you gave your blood sample for the T-Detect COVID test, had your symptoms gotten better, gotten worse or stayed the same?

- Gotten better
- Gotten worse
- Stayed the same

Q4. Did you or your healthcare provider decide to order the T-Detect COVID Test?

- My healthcare provider recommended the test
- I wanted to order the test
- I wanted to order the test and discussed it with my healthcare provider, and we decided together

**If Q4 = I wanted to order the test or I wanted to order the test and discussed it with my healthcare provider, and we decided together**

Q5. Why did you want to order the T-Detect COVID Test? (Select all that apply)

- I wanted to understand my prior COVID infection status to support decisions about my daily activities.
- I wanted to understand my prior COVID infection status to support a medical care decision (not related to the vaccine).
- To aid in my decision regarding receiving a COVID vaccine
- I have been experiencing “Long-COVID” symptoms and have not previously been positively diagnosed with COVID.
- I wanted to understand whether I had a detectable immune (T-cell) response following my prior COVID exposure.
- I wanted to understand whether I had a detectable immune (T-cell) response following my prior COVID vaccine.
- Other

**If Q5 = Other**

Q6. Please describe the other reason you decided to order the T-Detect COVID Test?

\_\_\_\_\_

Q7. Did you discuss the results of the T-Detect COVID test with your healthcare provider?

- Yes

- I have not discussed the results with my healthcare provider yet, but I do plan to.
- I have not discussed the results with my healthcare provider and do not plan to.

Q8. What did you do with the results of the T-Detect COVID test? (Select all that apply)

- Results of the T-Detect test supported my decisions about my daily activities.
- Results of the T-Detect test supported my decisions about my medical care (not related to the COVID-19 vaccine).
- Results of the T-Detect test supported my decisions about receiving a COVID-19 vaccine.
- I did nothing with the results.
- Other

**If Q8 = Other**

Q9. Please describe what you did with the results.

---

Q10. On a scale of 1-5, how useful were the results of the T-Detect COVID test?

- 5: Extremely useful
- 4: Very useful
- 3: Somewhat useful
- 2: Slightly useful
- 1: Not at all useful

**If Q4 = My healthcare provider recommended the test**

Q11. To the best of your knowledge, why did your healthcare provider recommend the T-Detect COVID Test for you? (Select all that apply)

- My healthcare provider wanted to understand my prior COVID infection status to support decisions about my daily activities.
- My healthcare provider wanted to understand my prior COVID infection status to support a medical care decision (not related to the vaccine).
- To aid in my decision regarding receiving a COVID vaccine
- My healthcare provider wanted to determine whether my “Long-COVID” symptoms are related to a past infection that had not previously been positively diagnosed.
- My healthcare provider wanted to determine whether I had a detectable immune (T-cell) response following my prior COVID exposure.
- My healthcare provider wanted to determine whether I had a detectable immune (T-cell) response following my prior COVID vaccine.
- Other

**If Q11 = Other**

Q12. Please describe the other reason your healthcare provider recommended the T-Detect COVID Test?

---

Q13. Did you discuss the results of the T-Detect COVID test with your healthcare provider?

- Yes
- I have not discussed the results with my healthcare provider yet, but I do plan to.
- I have not discussed the results with my healthcare provider and do not plan to.

**If Q13 = Yes**

Q14. What did your healthcare provider do with the results of the T-Detect COVID test? (Select all that apply)

- My healthcare provider assisted me with decisions about my daily activities.
- My healthcare provider assisted me with decisions about my medical care (not related to the COVID-19 vaccine).
- My healthcare provider assisted me with decisions about receiving a COVID-19 vaccine.
- My healthcare provider did not make any decisions based on the test results.
- Other

**If Q14 = Other**

Q15. Please describe what your healthcare provider did with the results.

---

Q16. On a scale of 1-5, how useful were the results of the T-Detect COVID test in the context of why you or your healthcare provider ordered the test?

- 5: Extremely useful
- 4: Very useful
- 3: Somewhat useful
- 2: Slightly useful
- 1: Not at all useful

COVID-19 Diagnosis, Symptoms and Treatment

Q1. Have you been diagnosed with COVID-19?

- Yes
- No

If Q1 = No → **Medical History Section**

If Q1 = Yes

Q2. Were you diagnosed with COVID-19 after being vaccinated?

- Yes
- No
- I have not been vaccinated
- Prefer not to answer

Q3. How were you diagnosed with COVID-19? (Select all that apply)

- I had a positive COVID-19 test (the most common are PCR or antigen tests)
- I tested positive for COVID-19 antibodies
- Other

If Q3 = I had a positive COVID-19 test (the most common are PCR or antigen tests)

Q4. What positive COVID-19 test did you have? (Select all that apply)

- PCR
- Antigen test
- Other

If Q4 = PCR

Q5. What date did you have your PCR test done? (Month/Day/Year)

\_\_\_\_\_  
(MM/DD/YYYY)

Q6. What was the reason for testing? (Select all that apply)

- I had symptoms of COVID-19
- I was exposed to someone with symptoms of COVID-19
- I was exposed to someone with a confirmed diagnosis of COVID-19
- A healthcare provider told me to get tested for COVID-19
- I was tested for an event or travel
- It was part of routine screening for work or to have a medical procedure
- Other

If Q6 = Other

Q7. Please describe the other reason for testing:

\_\_\_\_\_

**If Q4 = Antigen test**

Q8. What date did you have your antigen test done? (Month/Day/Year)

\_\_\_\_\_  
(MM/DD/YYYY)

Q9. What was the reason for testing? (Select all that apply)

- I had symptoms of COVID-19
- I was exposed to someone with symptoms of COVID-19
- I was exposed to someone with a confirmed diagnosis of COVID-19
- A healthcare provider told me to get tested for COVID-19
- I was tested for an event or travel
- It was part of routine screening for work or to have a medical procedure
- Other

**If Q9 = Other**

Q10. Please describe the other reason for testing:

\_\_\_\_\_

**If Q4 = Other**

Q11. Please describe the other COVID-19 test:

\_\_\_\_\_

Q12. What date did you have your other test done? (Month/Day/Year)

\_\_\_\_\_  
(MM/DD/YYYY)

Q13. What was the reason for testing? (Select all that apply)

- I had symptoms of COVID-19
- I was exposed to someone with symptoms of COVID-19
- I was exposed to someone with a confirmed diagnosis of COVID-19
- A healthcare provider told me to get tested for COVID-19
- I was tested for an event or travel
- It was part of routine screening for work or to have a medical procedure
- Other

**If Q13 = Other**

Q14. Please describe the other reason for testing:

\_\_\_\_\_

**If Q3 = I tested positive for COVID-19 antibodies**

Q15. What date did you have your antibody test done? ((MM/DD/YYYY)

\_\_\_\_\_  
(MM/DD/YYYY)

**If Q3 = Other**

Q16. Please describe the other way you were diagnosed with COVID-19?

---

**Please answer the following questions regarding your first (or only) COVID-19 infection.**  
**We will ask about re-infections later in the questionnaire.**

Q17. Did you experience symptoms related to COVID-19?

- Yes
- No

**If Q17 = Yes**

Q18. Did you experience any of the following common symptoms related to COVID-19?

- Fever
- Chills
- Cough
- Shortness of breath or difficulty breathing
- Chest pain or pressure
- Fatigue
- Muscle or body aches
- Headache
- Sore Throat
- Runny or stuffy nose
- None

Q19. Did you experience any of the following gastrointestinal symptoms related to COVID-19?

- Nausea or vomiting
- Abdominal pain
- Diarrhea
- Loss of appetite
- None

Q20. Did you experience any of the following neurological symptoms related to COVID-19?

- Loss of taste or smell
- Trembling or shaking
- Tingling or numbness
- Dizziness
- Sudden confusion
- Slurred speech
- Difficulty waking up
- Difficulty sleeping
- Difficulty concentrating or focusing
- Inability to exercise or be active
- Anxiety
- Memory problems
- None



Q21. Did you experience symptoms related to COVID-19 other than the ones described above?

---

Q22. Approximately, when did your symptoms start (DD/MM/YYYY)?

---

  
(MM/DD/YYYY)

Q23. Approximately, when did your symptoms stop (DD/MM/YYYY)?

---

  
(MM/DD/YYYY)

Q24. How did your symptoms, when they were the most severe, affect your daily activities?

Please select one of the following:

- I was fully active and able to carry out normal routine without restriction
- I was unable to do strenuous or intense physical activity but able to carry out light housework or office work
- I was walking and capable of all self-care but unable to carry out any work activities; up and about more than 50% of waking hours
- I was capable of only limited self-care; confined to bed or chair more than 50% of waking hours
- I was unable to carry on any self-care and was confined to the bed or chair

Q25. How did your symptoms affect your productivity or effectiveness at work? Please select one of the following:

- There were no changes to my normal productivity or effectiveness at work
- I was productive or effective at work most of the time
- I was productive or effective at work some of the time
- I was unable to be productive or effective at work

Q26. How much work did you miss due to your COVID-19 symptoms?

- None (0-1 Day)
- Several Days (2-6 Days)
- More than half the days (7-11 Days)
- Almost Daily (12-14 Days)
- I am unable to work/no longer employed as a result of my condition
- Not Applicable

Q27. Did you go to the emergency department for your symptoms?

- Yes
- No

Q28. Were you hospitalized due to your symptoms?

- Yes
- No

If Q28 = Yes

Q29. When were you hospitalized (Month/Day/Year)?

\_\_\_\_\_  
(MM/DD/YYYY)

Q30. How long were you hospitalized for?

\_\_\_\_\_

Q31. Were you cared for in the intensive care unit (ICU)?

- Yes
- No

Q32. Did you require any of the following? (Select all that apply)

- Supplemental oxygen (by nasal cannula, face mask, etc.)
- Ventilator
- ECMO
- None of the Above

Q33. Did you receive any of the following treatments? (Select all that apply)

- Remdesivir
- Steroids
- Convalescent plasma
- Monoclonal antibody therapy
- Hydroxychloroquine
- Azithromycin
- Other
- None of the Above

**If Q33 = Remdesivir**

Q34. When did you take remdesivir? If known, please provide the start and end date of treatment.

\_\_\_\_\_

**If Q33 = Steroids**

Q35. When did you take steroids? If known, please provide the start and end date of treatment.

\_\_\_\_\_

**If Q33 = Convalescent plasma**

Q36. How many times did you receive convalescent plasma?

- 1
- 2
- 3
- 4
- More than 4 times

**Q36 will determine how many q's below the participant receives.**

Q37. When did you receive convalescent plasma (Month/Day/Year)?

\_\_\_\_\_  
(MM/DD/YYYY)

Q38. When did you receive convalescent plasma (Month/Day/Year)?

\_\_\_\_\_  
(MM/DD/YYYY)

Q39. When did you receive convalescent plasma (Month/Day/Year)?

\_\_\_\_\_  
(MM/DD/YYYY)

Q40. When did you receive convalescent plasma (Month/Day/Year)?

\_\_\_\_\_  
(MM/DD/YYYY)

If Q36 = More than 4 times

Q41. Please describe the number of times and when you received convalescent plasma (Month/Day/Year)?

\_\_\_\_\_

**If Q33 = Monoclonal antibody therapy**

Q42. What monoclonal antibody did you receive (Month/Day/Year)?

- Bamlanivimab (LY-CoV555)
- Bamlanivimab + etesevimab
- Casirivimab and imdevimab (REGN-COV2)
- Infliximab (Remicade)
- Other
- Not sure

Q43. Please describe any other monoclonal antibody treatment you received:

\_\_\_\_\_

Q44. When did you receive monoclonal antibodies?

\_\_\_\_\_  
(MM/DD/YYYY)

**If Q33 = Hydroxychloroquine**

Q45. When did you start taking hydroxychloroquine (Month/Day/Year)?

\_\_\_\_\_  
(MM/DD/YYYY)

Q46. When did you stop taking hydroxychloroquine (Month/Day/Year)?

\_\_\_\_\_  
(MM/DD/YYYY)

**If Q33 = Azithromycin**

Q47. When did you start taking azithromycin (Month/Day/Year)?

\_\_\_\_\_  
(MM/DD/YYYY)

Q48. When did you stop taking azithromycin (Month/Day/Year)?

\_\_\_\_\_  
(MM/DD/YYYY)

**If Q33 = Other**

Q49. Please describe any other treatments you received for COVID-19 and the approximate dates you received them.

\_\_\_\_\_

Q50. Have you recovered from COVID-19?

- Yes
- No

**If Q50 = No → Long Term Complications from COVID-19 Section**

**If Q50 = Yes**

Q51. How do you know you recovered from COVID-19? (Select all that apply)

- My healthcare provider cleared me
- I had a negative PCR or antigen test
- I no longer have symptoms
- Other

**If Q51 = Other**

Q52. Please describe how you know you recovered from COVID-19?

\_\_\_\_\_

Q53. When were you told you recovered from COVID-19 (Month/Day/Year)?

\_\_\_\_\_  
(MM/DD/YYYY)

**If Q50 = Yes**

Q51. Have you been reinfected with COVID-19 after recovering from COVID-19?

- Yes
- No

**If Q51 = Yes**

**Repeat questions Q2. – Q51**

**Please answer the following questions regarding your second COVID-19 infection.**

**If Q51 = No → Long Term Complications from COVID-19 Section**

Long Term Complications from COVID-19

Q1. Since having COVID-19, have you been diagnosed with any of the following?

- Heart attack
- Stroke or mini stroke/TIA
- Kidney problems
- Deep vein thrombosis (DVT, “blood clot in leg”)
- Pulmonary embolism (PE, “blood clot in lung”)
- Other
- None

**If Q1 = Heart attack**

Q2. When were you diagnosed with a heart attack? (Month/Day/Year)?

\_\_\_\_\_  
(MM/DD/YYYY)

Q3. Did your doctor think your diagnosis of a heart attack was related to COVID-19?

- Yes
- No
- Not sure

**If Q1 = Stroke or mini stroke/TIA**

Q4. When were you diagnosed with a stroke or mini stroke/TIA? (Month/Day/Year)?

\_\_\_\_\_  
(MM/DD/YYYY)

Q5. Did your doctor think your diagnosis of a stroke or mini stroke/TIA was related to COVID-19?

- Yes
- No
- Not sure

**If Q1 = Kidney problems**

Q6. When were you diagnosed with kidney problems? (Month/Day/Year)?

\_\_\_\_\_  
(MM/DD/YYYY)

Q7. Did your doctor think your diagnosis of kidney problems was related to COVID-19?

- Yes
- No
- Not sure

**If Q1 = Deep vein thrombosis (DVT, “clot in leg”)**

Q8. When were you diagnosed with deep vein thrombosis (DVT, “blood clot in leg”)?  
(Month/Day/Year)?

\_\_\_\_\_

Q9. Did your doctor think your diagnosis of deep vein thrombosis (DVT, “blood clot in leg”) was related to COVID-19?

- Yes
- No
- Not sure

**If Q1 = Pulmonary embolism (PE, “clot in lung”)**

Q10. When were you diagnosed with pulmonary embolism (PE, “blood clot in lung”) (Month/Day/Year)?

\_\_\_\_\_

(MM/DD/YYYY)

Q11. Did your doctor think your diagnosis of pulmonary embolism (PE, “blood clot in lung”) was related to COVID-19?

- Yes
- No
- Not sure

**If Q1 = Other**

Q12. Please describe your other condition(s):

\_\_\_\_\_

Q13. When were you diagnosed with other (Month/Day/Year)?

\_\_\_\_\_

(MM/DD/YYYY)

Q14. Did your doctor think your diagnosis of other was related to COVID-19?

- Yes
- No
- Not sure

Q15. Have you been diagnosed with a post-COVID condition by a healthcare provider (it may also have been called long COVID, long-haul COVID, post-acute COVID-19, long-term effects of COVID, or chronic COVID)?

- Yes
- No

**If Q15 = No**

Q16. Did you experience any new or ongoing health problems four or more weeks after your COVID-19 diagnosis?

- Yes
- No

**If Q16 = No → Medical History Section**

**If Q15 or Q16 = Yes**

Q17. Have you experienced any of the following respiratory and sinus symptoms since you had COVID-19?

- Difficulty breathing or shortness of breath
- Persistent cough
- Chest pain, pressure or tightness
- Sneezing
- Runny nose
- Sore throat
- Other
- None of the above

**If Q17 = Other**

Q18. Please describe the other respiratory and sinus symptoms you have experienced since you had COVID-19.

---

Q19. When did you begin experiencing these symptoms? (Please mark when you first experienced the respiratory and sinus symptoms since being diagnosed with COVID-19, in the first 4 weeks, then months, as applicable.)

- Week 1
- Week 2
- Week 3
- Week 4
- Month 2
- Month 3
- Month 4
- Month 5
- Month 6
- Month 7
- Month 8
- Month 9
- Month 10
- Month 11
- Month 12

Q20. Have you experienced extreme tiredness or fatigue since you had COVID-19?

- Yes
- No

Q21. When did you begin experiencing these symptoms? (Please mark when you first experienced extreme tiredness or fatigue since being diagnosed with COVID-19, in the first 4 weeks, then months, as applicable.)

- Week 1
- Week 2
- Week 3

- Week 4
- Month 2
- Month 3
- Month 4
- Month 5
- Month 6
- Month 7
- Month 8
- Month 9
- Month 10
- Month 11
- Month 12

Q22. Have you experienced issues with brain fog (inability to focus, think clearly, plan, process, understand, and maintain a coherent stream of thought; abnormally slow or fast thoughts) since you had COVID-19?

- Yes
- No

Q23. When did you begin experiencing these symptoms? (Please mark when you first experienced brain fog symptoms since being diagnosed with COVID-19, for the first 4 weeks, then months, as applicable.)

- Week 1
- Week 2
- Week 3
- Week 4
- Month 2
- Month 3
- Month 4
- Month 5
- Month 6
- Month 7
- Month 8
- Month 9
- Month 10
- Month 11
- Month 12

Q24. Have you experienced any of the following gastrointestinal issues since you had COVID-19?

- Diarrhea
- Abdominal pain
- Constipation
- Vomiting
- Loss of appetite
- None of the above



Q25. When did you begin experiencing these symptoms? (Please mark when you first experienced the gastrointestinal issues since being diagnosed with COVID-19, in the first 4 weeks, then months, as applicable.)

- Week 1
- Week 2
- Week 3
- Week 4
- Month 2
- Month 3
- Month 4
- Month 5
- Month 6
- Month 7
- Month 8
- Month 9
- Month 10
- Month 11
- Month 12

Q26. Have you experienced any of the following headache or related issues since you had COVID-19?

- Headaches, at the base of the skull
- Headaches, in the temples
- Headaches, behind the eyes
- Headaches, diffuse (entire brain)
- Headaches/pains after mental exertion
- Sensation of brain warmth
- Sensation of brain pressure
- Migraines
- Stiff neck
- Other
- None of the above

**If Q26 = Other**

Q27. Please describe the other headache or related issues you have experienced since you had COVID-19.

---

Q28. When did you begin experiencing these symptoms? (Please mark when you first experienced headache or related issues since being diagnosed with COVID-19, in the first 4 weeks, then months, as applicable.)

- Week 1
- Week 2
- Week 3
- Week 4

- Month 2
- Month 3
- Month 4
- Month 5
- Month 6
- Month 7
- Month 8
- Month 9
- Month 10
- Month 11
- Month 12

Q29. Have you experienced any of the following cardiovascular issues since you had COVID-19?

- Tachycardia (high heart rate)
- Bradycardia (low heart rate)
- Heart palpitations (Feeling like your heart is racing, thumping or skipping beats)
- Abnormally high blood pressure
- Fainting
- Blood clots
- None of the above

Q30. When did you begin experiencing these symptoms? (Please mark when you first experienced the cardiovascular issues since being diagnosed with COVID-19, in the first 4 weeks, then months, as applicable.)

- Week 1
- Week 2
- Week 3
- Week 4
- Month 2
- Month 3
- Month 4
- Month 5
- Month 6
- Month 7
- Month 8
- Month 9
- Month 10
- Month 11
- Month 12

Q31. Have you experienced any of the following muscle and joint issues since you had COVID-19?

- Muscle spasms
- Muscle aches
- Joint pain

- Bone aches
- None of the above

Q32. When did you begin experiencing these symptoms? (Please mark when you first experienced the muscle and joint issues since being diagnosed with COVID-19, in the first 4 weeks, then months, as applicable.)

- Week 1
- Week 2
- Week 3
- Week 4
- Month 2
- Month 3
- Month 4
- Month 5
- Month 6
- Month 7
- Month 8
- Month 9
- Month 10
- Month 11
- Month 12

Q33. Which of the following neurological sensation symptoms have you first experienced since you had COVID-19?

- Skin sensations: burning, tingling, or itchiness without rash
- Numbness/loss of sensation
- Coldness
- Tingling/prickling pins and needles
- Electrical zaps/electrical shock sensation
- Facial paralysis
- Sensation of facial pressure/numbness
- Weakness
- None of the above

Q34. When did you begin experiencing these symptoms? (Please mark when you first experienced the neurological sensation symptoms since being diagnosed with COVID-19, in the first 4 weeks, then months, as applicable.)

- Week 1
- Week 2
- Week 3
- Week 4
- Month 2
- Month 3
- Month 4
- Month 5
- Month 6

- Month 7
- Month 8
- Month 9
- Month 10
- Month 11
- Month 12

Q35. Have you experienced any of the following memory related symptoms since you had COVID-19?

- Short-term memory loss
- Long-term memory loss
- Not being able to make new memories
- Forgetting how to do routine tasks
- Other
- None of the above

**If Q35 = Other**

Q36. Please describe the other memory symptoms you have experienced since you had COVID-19.

---

Q37. When did you begin experiencing these symptoms? (Please mark when you first experienced memory symptoms since being diagnosed with COVID-19, in the first 4 weeks, then months, as applicable.)

- Week 1
- Week 2
- Week 3
- Week 4
- Month 2
- Month 3
- Month 4
- Month 5
- Month 6
- Month 7
- Month 8
- Month 9
- Month 10
- Month 11
- Month 12

Q38. Have you experienced any sleep issues since you had COVID-19?

- Yes
- No

**If Q38 = Yes**

Q39. Which of the following sleep issues have you experienced since you had COVID-19?

- Lucid dreams, vivid dreams, or nightmares
- Insomnia
- Night sweats
- Restless leg syndrome
- Sleep apnea
- Other

**If Q39 = Other**

Q40. Please describe the other sleep issues you have experienced since you had COVID-19.

---

Q41. When did you begin experiencing these symptoms? (Please mark when you first experienced sleep issues since being diagnosed with COVID-19, in the first 4 weeks, then months, as applicable.)

- Week 1
- Week 2
- Week 3
- Week 4
- Month 2
- Month 3
- Month 4
- Month 5
- Month 6
- Month 7
- Month 8
- Month 9
- Month 10
- Month 11
- Month 12

Q42. Have you experienced any of the following temperature issues since you had COVID-19?

- Elevated temperature (98.8-100.4 degrees Fahrenheit)
- Fever (100.4 degrees Fahrenheit)
- Low temperature
- Chills/flushing/sweats
- Heat intolerance
- Temperature lability (quick swings in and out of fever or elevated temperature)
- None of the above

Q43. When did you begin experiencing these symptoms? (Please mark when you first experienced the temperature issues since being diagnosed with COVID-19, in the first 4 weeks, then months, as applicable.)

- Week 1
- Week 2
- Week 3
- Week 4

- Month 2
- Month 3
- Month 4
- Month 5
- Month 6
- Month 7
- Month 8
- Month 9
- Month 10
- Month 11
- Month 12

Q44. Have you experienced any of the following skin and allergy symptoms since you had COVID-19?

- Itchy skin
- Peeling skin
- COVID toes (discoloration, swelling, painful, or blistering toes)
- New allergies (food, chemical, environmental, etc.)
- Skin rashes
- Other
- None of the above

**If Q44 = Other**

Q45. Please describe the other skin and allergy symptoms you have experienced since you had COVID-19.

---

Q46. When did you begin experiencing these symptoms? (Please mark when you first experienced the skin and allergy symptoms since being diagnosed with COVID-19, in the first 4 weeks, then months, as applicable.)

- Week 1
- Week 2
- Week 3
- Week 4
- Month 2
- Month 3
- Month 4
- Month 5
- Month 6
- Month 7
- Month 8
- Month 9
- Month 10
- Month 11
- Month 12

Q47. Have you experienced any changes to your sense of smell or taste since you had COVID-19?

- Yes
- No

**If Q47 = Yes**

Q48. Which of the following sense of smell or taste issues have you experienced since you had COVID-19?

- Loss of smell
- Phantom or unusual smells
- Heightened sense of smell
- Loss of taste
- Phantom or unusual tastes
- Heightened sense of taste
- Altered sense of taste

Q49. When did you begin experiencing these symptoms? (Please mark when you first experienced sense of smell or taste symptoms since being diagnosed with COVID-19, in the first 4 weeks, then months, as applicable.)

- Week 1
- Week 2
- Week 3
- Week 4
- Month 2
- Month 3
- Month 4
- Month 5
- Month 6
- Month 7
- Month 8
- Month 9
- Month 10
- Month 11
- Month 12

Q50. Have you experienced any changes in your menstrual period cycles since you had COVID-19?

- Yes
- No
- Not Applicable

Q51. Have you experienced any changes in your mood since you had COVID-19?

- Yes
- No

Q52. How severe were/are your symptoms over the course of the following weeks/months?  
Please select the most severe within each time period.

Q53. Week 1

- No symptoms
- Very mild
- Mild
- Moderate
- Severe
- Very severe

Q54. Week 2

- No symptoms
- Very mild
- Mild
- Moderate
- Severe
- Very severe

Q55. Week 3

- No symptoms
- Very mild
- Mild
- Moderate
- Severe
- Very severe

Q56. Week 4

- No symptoms
- Very mild
- Mild
- Moderate
- Severe
- Very severe

Q57. Month 2

- No symptoms
- Very mild
- Mild
- Moderate
- Severe
- Very severe

Q58. Month 3

- No symptoms
- Very mild



- Mild
- Moderate
- Severe
- Very severe

Q59. Month 4

- No symptoms
- Very mild
- Mild
- Moderate
- Severe
- Very severe

Q60. Month 5

- No symptoms
- Very mild
- Mild
- Moderate
- Severe
- Very severe

Q61. Month 6

- No symptoms
- Very mild
- Mild
- Moderate
- Severe
- Very severe

Q62. Month 7

- No symptoms
- Very mild
- Mild
- Moderate
- Severe
- Very severe

Q63. Month 8

- No symptoms
- Very mild
- Mild
- Moderate
- Severe
- Very severe

Q64. Month 9

- No symptoms
- Very mild
- Mild
- Moderate
- Severe
- Very severe

Q65. Month 10

- No symptoms
- Very mild
- Mild
- Moderate
- Severe
- Very severe

Q66. Month 11

- No symptoms
- Very mild
- Mild
- Moderate
- Severe
- Very severe

Q67. Month 12

- No symptoms
- Very mild
- Mild
- Moderate
- Severe
- Very severe

Q68. Please describe your experience with any relapsing symptoms. (Select all that apply)

- I have not experienced relapses
- My relapses happen in a regular pattern
- My relapses happen in an irregular pattern
- My relapses happen in response to a trigger (stress, alcohol, exertion, etc.)
- My relapses are becoming shorter/easier over time
- My relapses are becoming longer/more difficult over time
- My relapse severity has stayed the same
- My symptoms have slowly gotten better over time
- My symptoms have stayed the same over time
- My symptoms have slowly worsened over time
- I got worse rapidly
- I got better rapidly

*Adaptive Biotechnologies Corp., Seattle, Washington, USA*  
*PRO-00854, ADAP-009*  
*WIRB# 20210171*  
*Version 4*

IRB Approved at the  
Protocol Level  
Sep 27, 2021

Post-COVID-19 Functional Status

Q1. Can you live alone without any assistance from another person? (e.g. independently being able to eat, walk, use the toilet and manage routine daily hygiene)

- Yes
- No (if no, skip to Q9)

Q2. Are there duties/activities at home or at work which you are no longer able to perform yourself?

- Yes (if yes, skip to Q5)
- No

Q3. Do you suffer from symptoms, pain, depression or anxiety?

- Yes
- No (if no, skip to Q5)

Q4. Do you need to avoid or reduce duties/activities or spread these over time?

- Yes
- No

Q5. Over the past two weeks, how often did you have problems with productivity or effectiveness at work?

- Not at all (0-1 Day)
- Several Days (2-6 Days)
- More than half the days (7-11 Days)
- Almost Daily (12-14 Days)
- Not Applicable

If Q5 does not = Not Applicable

Q6. Are these issues new since testing positive for COVID-19, or were they present before COVID-19?

- These issues are new
- I had these issues before COVID-19

Q7. Over the past two weeks, how often did you have problems with absenteeism

- Not at all (0-1 Day)
- Several Days (2-6 Days)
- More than half the days (7-11 Days)
- Almost Daily (12-14 Days)
- Not Applicable

If Q7 does not = Not Applicable

Q8. Are these issues new since testing positive for COVID-19, or were they present before COVID-19?

- These issues are new
- I had these issues before COVID-19

Q9. How much are you currently affected in your everyday life by COVID-19? Please indicate which one of the following statements applies to you most.

- I have no limitations in my everyday life and no symptoms, pain, depression, or anxiety.
- I have negligible limitations in my everyday life as I can perform all usual duties/activities, although I still have persistent symptoms, pain, depression, or anxiety.
- I suffer from limitations in my everyday life as I occasionally need to avoid or reduce usual duties/activities or need to spread these over time due to symptoms, pain, depression or anxiety. I am, however, able to perform all activities without any assistance.
- I suffer from limitations in my everyday life as I am not able to perform all usual duties/activities due to symptoms, pain, depression, or anxiety. I am, however, able to take care of myself without any assistance
- I suffer from severe limitations in my everyday life: I am not able to take care of myself and therefore I am dependent on nursing care and/or assistance from another person due to symptoms, pain, depression or anxiety.

Past Medical History

Q1. Please list all of your current medications (prescribed, over the counter and supplements):

\_\_\_\_\_

Q2. Do you currently take any medication that suppress your immune system, such as steroids or other immunosuppressants)?

- Yes
- No

**If Q2 Yes**

Q3. Please list the medication(s):

\_\_\_\_\_

Q4. Have you been diagnosed with any of the following medical conditions? (Select all that apply)

- Diabetes (Type 1)
- Diabetes (Type 2)
- Hypertension
- Heart disease
- Lung disease
- Asthma
- Stroke
- Obesity
- None

Q5. When were you diagnosed (MM/YYYY)?

\_\_\_\_\_  
(MM//YYYY)

Q6. Have you ever been diagnosed with any of the following autoimmune diseases?

- Rheumatoid Arthritis
- Type 1 Diabetes (i.e. started when you were younger and requiring insulin)
- Celiac disease
- Lupus
- Ulcerative Colitis
- Crohn's disease
- Multiple Sclerosis
- Scleroderma
- Sjögren's disease
- Primary biliary cirrhosis
- Primary sclerosing cholangitis
- Psoriasis
- Hashimoto's thyroiditis
- Autoimmune hepatitis
- Addison's disease

- Other
- None

**If Q6=Other**

Q7. Please list your other diagnosed autoimmune diseases:

---

Q8. When were you diagnosed (MM/YYYY)?

---

(MM//YYYY)

**If Q6. Does not = None, i.e. any other response is selected**

Q9. Do you currently take any medication to manage your autoimmune disease (such as a steroid or immunosuppressant)?

- Yes
- No

**If Q9 =Yes**

Q10. Please list your current medications to manage your autoimmune disease:

---

Q11. Have you ever been diagnosed with cancer?

- Yes
- No

**If Q11 =Yes**

Q12. Please list your diagnosed cancer(s):

---

Q13. When were you diagnosed (MM/YYYY)?

---

(MM//YYYY)

Q14. Are you currently taking any medication or receiving treatment for your cancer?

- Yes
- No

**If Q14 =Yes**

Q15. Please list your current medications or treatment for your cancer:

---

Q16. Have you ever received a bone marrow, cord blood or other stem cell transplant as a treatment for your cancer?

- Yes
- No

Q17. Have you ever been diagnosed with any of the following infectious diseases?

- Chickenpox
- Diphtheria
- E. coli
- Giardiasis
- HIV/AIDS
- Hepatitis B
- Hepatitis C
- Infectious mononucleosis
- Lyme disease
- Malaria
- Measles
- Meningitis
- Mumps
- Pelvic Inflammatory Disease (PID)
- Poliomyelitis (polio)
- Pneumonia
- Rocky mountain spotted fever
- Rubella (German measles)
- Severe acute respiratory syndrome (SARS)
- Sexually transmitted diseases
- Shingles (herpes zoster)
- Tetanus
- Toxic shock syndrome
- Tuberculosis
- Viral hepatitis
- West Nile virus
- Whooping cough (pertussis)
- Other
- None

**If Q17 = Sexually transmitted diseases**

Q18. What sexually transmitted disease have you been diagnosed with?

- Bacterial Vaginosis
- Chlamydia
- Gonorrhea
- Herpes
- Human papillomavirus (HPV)
- Syphilis
- Trichomoniasis
- Other
- Prefer not to answer



**If Q18=Other**

Q19. Please list your other diagnosed sexually transmitted diseases:

---

**If Q7=Other**

Q20. Please list your other diagnosed infectious diseases:

---

Q21. When were you diagnosed (MM/YYYY)?

\_\_\_\_\_  
(MM//YYYY)

**If Q17. Does not = None, i.e. any other response is selected**

Q22. Do you currently take any medication to manage your infectious disease (such as a steroid or immunosuppressant)?

- Yes
- No

**If Q22 = Yes**

Q23. Please list your current medications to manage your infectious disease:

---

### Family Medical History

Please complete the following family medical history for your first-degree and second-degree relatives as defined below:

- A first-degree relative is defined as a close blood relative which includes your parents, full siblings, or children.
- A second-degree relative is defined as a blood relative which includes your grandparents, grandchildren, aunts, uncles, nephews, nieces or half-siblings.

Q1. Do you have a first-degree relative who has been diagnosed with any of the following medical conditions? Please select all that apply:

- Diabetes (Type 1)
- Diabetes (Type 2)
- Hypertension
- Heart Disease
- Lung Disease
- Asthma
- Stroke
- Obesity
- Other
- None
- Not sure

**If Q1 = Other**

Q2. Please list the other diagnosed medical conditions:

---

Q3. Do you have a second-degree relative who has been diagnosed with any of the following medical conditions? Please select all that apply:

- Diabetes (Type 1)
- Diabetes (Type 2)
- Hypertension
- Heart Disease
- Lung Disease
- Asthma
- Stroke
- Obesity
- Other
- None
- Not sure

**If Q3 = Other**

Q4. Please list the other diagnosed medical conditions:

---

Q5. Do you have a first-degree relative who has been diagnosed with any of the following autoimmune diseases?

- Rheumatoid Arthritis
- Type 1 Diabetes (i.e. started when you were younger and requiring insulin)
- Celiac disease
- Lupus
- Ulcerative Colitis
- Crohn's disease
- Multiple Sclerosis
- Scleroderma
- Sjögren's disease
- Primary biliary cirrhosis
- Primary sclerosing cholangitis
- Psoriasis
- Hashimoto's thyroiditis
- Autoimmune hepatitis
- Addison's disease
- Other
- None
- Not sure

**If Q5=Other**

Q6. Please list the other diagnosed autoimmune diseases:

---

Q7. Do you have a second-degree relative who has been diagnosed with any of the following autoimmune diseases?

- Rheumatoid Arthritis
- Type 1 Diabetes (i.e. started when you were younger and requiring insulin)
- Celiac disease
- Lupus
- Ulcerative Colitis
- Crohn's disease
- Multiple Sclerosis
- Scleroderma
- Sjögren's disease
- Primary biliary cirrhosis
- Primary sclerosing cholangitis
- Psoriasis
- Hashimoto's thyroiditis
- Autoimmune hepatitis
- Addison's disease
- Other
- None
- Not sure

**If Q7=Other**

Q8. Please list the other diagnosed autoimmune diseases:

---

Q9. Do you have a first-degree relative who has diagnosed with cancer?

Yes

No

**If Q9 = Yes**

Q10. Please list the diagnosed cancer(s):

---

Q11. Do you have a second-degree relative who has diagnosed with cancer?

Yes

No

**If Q11 = Yes**

Q12. Please list the diagnosed cancer(s):

---
